# Supplementary material for: Electronic and magnetic properties of the RuX3 (X = Cl, Br, I) family: two siblings—and a cousin?
Source: Springer Nature journal article supplement (doi:10.1038/s41535-022-00481-3), 2022-07-29
Supplement: MOESM1 [file 41535_2022_481_MOESM1_ESM.pdf]

# Supplementary Information:

## Electronic and magnetic properties of the $\text{RuX}_3$ ( $\text{X}=\text{Cl, Br, I}$ ) family: Two siblings — and a cousin?

David A. S. Kaib,<sup>1,\*</sup> Kira Riedl,<sup>1,†</sup> Aleksandar Razpopov,<sup>1</sup> Ying Li,<sup>2</sup> Steffen Backes,<sup>3</sup> Igor I. Mazin,<sup>4</sup> and Roser Valenti<sup>1,‡</sup>

<sup>1</sup>*Institut für Theoretische Physik, Goethe-Universität, 60438 Frankfurt am Main, Germany*

<sup>2</sup>*Department of Applied Physics and MOE Key Laboratory for Nonequilibrium Synthesis and Modulation of Condensed Matter, School of Physics, Xi'an Jiaotong University, Xi'an 710049, China*

<sup>3</sup>*CPHT, CNRS, Ecole Polytechnique, Institut Polytechnique de Paris, Route de Saclay, 91128 Palaiseau, France*

<sup>4</sup>*Department of Physics and Astronomy, George Mason University, Fairfax, Virginia 22030, United States*

(Dated: July 4, 2022)

### Supplementary Note 1: Overview of experimental specific heat data

In Supplementary Fig. 1 we show a comparative overview of the low-temperature specific heat data for the  $\text{RuX}_3$  family, with data extracted from plots of Supplementary Refs. 1–4. The specific heat for  $\text{RuCl}_3$  displays a well-defined peak at  $T_N \approx 7$  K denoting the onset of the zigzag order, while the onset of long-range magnetic order in  $\text{RuBr}_3$  is observed by a kink at  $T_N = 34$  K [2] (not within plot range of Supplementary Fig. 1). None of this is observed for the  $\text{RuI}_3$  measurements [3, 4].

### Supplementary Note 2: Crystal structural details

The structural details for  $\text{RuCl}_3$  (C2/m [5] and  $R\bar{3}$  [6]),  $\text{RuBr}_3$  ( $R\bar{3}$  [2]), and  $\text{RuI}_3$  ( $R\bar{3}$  [3]) are summarized in Supplementary Table 1. For  $\text{RuCl}_3$ , some reports are indicating the low-temperature structures of C2/m symmetry [5, 7], while others report  $R\bar{3}$  structure symmetry [6, 8]. Given the

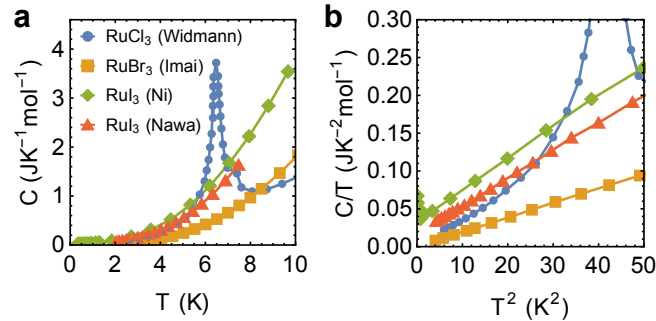

Supplementary Figure 1. **Specific heat  $C$  for various reported samples.** **a**  $C$  versus  $T$ , **b**  $C/T$  versus  $T^2$ . Data was extracted from plots in the following references and labelled by respective first-author names:  $\text{RuCl}_3$  (Widmann) [1],  $\text{RuBr}_3$  (Imai) [2],  $\text{RuI}_3$  (Ni) [3],  $\text{RuI}_3$  (Nawa) [4].

\* kaib@itp.uni-frankfurt.de

† riedl@itp.uni-frankfurt.de

‡ valenti@itp.uni-frankfurt.de

|           | $\text{RuCl}_3$               | $\text{RuBr}_3$ | $\text{RuI}_3$ |
|-----------|-------------------------------|-----------------|----------------|
|           | C2/m                          | $R\bar{3}$      | $R\bar{3}$     |
| a (Å)     | 5.981                         | 5.973           | 6.296          |
| b (Å)     | 10.354                        | 5.973           | 6.296          |
| c (Å)     | 6.014                         | 16.93           | 17.911         |
| Ru-Ru (Å) | 3.448 (3.454)                 | 3.449           | 3.635          |
| Ru-X-Ru   | $93.6^\circ$ ( $93.9^\circ$ ) | $94.10^\circ$   | $92.71^\circ$  |
| Ru-X (Å)  | 2.36                          | 2.36            | 2.51           |
|           | 2.35                          | 2.35            | 2.52           |

Supplementary Table 1. **Crystallographic structural details.** The structures are obtained from references 2, 3, 5, and 6. In the C2/m structure the values are for  $Z_1$  bonds ( $X_1/Y_1$  bonds).

fragility and easy deformability of the van-der-Waals layering, it is plausible that the structures may vary qualitatively between different samples of  $\text{RuCl}_3$ , and the same can be expected for the new members of the  $\text{RuX}_3$  family. Recent measurements on  $\text{RuBr}_3$  [2] indicate a  $R\bar{3}$  symmetry, while for  $\text{RuI}_3$ , crystals with  $R\bar{3}$  [3] and  $P\bar{3}1c$  [4] symmetries have been grown. For our electronic structure calculations we consider the experimentally reported C2/m and  $R\bar{3}$  structures for  $\text{RuCl}_3$ , and the suggested  $R\bar{3}$  structures for  $\text{RuBr}_3$  and  $\text{RuI}_3$ . Since the  $R\bar{3}$  structure of  $\text{RuCl}_3$  yielded very similar results and the same conclusions as the C2/m structure, we only presented the C2/m results in the main text. The magnetic model extracted for the  $R\bar{3}$  structure is given in Supplementary Table 3.

### Supplementary Note 3: Magnetic ground state properties within DFT

In Supplementary Table 2 we compare measured magnetic properties (subscript “exp”) [2–4, 9] to results from total-energy GGA+SOC+U calculations (“DFT”) and with exact diagonalization (“ED”) results of the pseudospin models of Fig. 5 in the main manuscript.  $\phi_M$  and  $\theta_M$  characterize the ordered moment direction, as defined in Fig. 1b of the main manuscript. In the case of  $\text{RuI}_3$ , different magnetic orders and moment directions are extremely close in energy, with Néel AFM or Zigzag order as lowest states, while in ED the

|                                   | RuCl <sub>3</sub> | RuBr <sub>3</sub> | RuI <sub>3</sub> |
|-----------------------------------|-------------------|-------------------|------------------|
| GS <sub>exp</sub>                 | Zigzag            | Zigzag            | metal?           |
| $\theta_{M,exp}$                  | 32°               | 64°               | —                |
| $\phi_{M,exp}$                    | 90°               | 90°               | —                |
| GS <sub>DFT</sub>                 | Ferro             | Zigzag            | Néel/Zigzag      |
| $\theta_{M,DFT}$                  | 0°                | 5°                |                  |
| $\phi_{M,DFT}$                    | 0°                | 86°               |                  |
| $M_{DFT}(\mu_B)$                  | 0.67              | 0.47              | 0.22             |
| $\delta E_{DFT}^{FM-GS}$ (meV/Ru) | 0                 | 73.61             | 26.15            |
| $\delta E_{DFT}^{ZZ-GS}$ (meV/Ru) | 3.26              | 0                 | 0.95             |
| $\delta E_{DFT}^{NL-GS}$ (meV/Ru) | 12.08             | 6.27              | 0                |
| $\delta E_{DFT}^{ST-GS}$ (meV/Ru) | 11.08             | 118.14            | 22.41            |
| GS <sub>ED</sub>                  | Zigzag            | Zigzag            | QSL?             |
| $\theta_{M,ED}$                   | 34.4°             | 32.4°             |                  |
| $\phi_{M,ED}$                     | 90°               | 90°               |                  |

Supplementary Table 2. **Magnetic ground state (GS) properties of the RuX<sub>3</sub> family.** Experiment (subscript “exp”) [2–4, 9] vs total-energy GGA+SOC+U via VASP (with  $U_{eff} = 1.5$  eV) results (subscript “DFT”) vs solving magnetic models of Fig. 5 in the main manuscript with exact diagonalization (“ED”). The angles  $\theta_M$  and  $\phi_M$  describe the direction of the magnetic ordered moment, see Fig. 1b,c in the main manuscript. We define  $\delta E_{DFT}^{i-GS}$  as the energy difference between the state  $i$  [ $i = FM$  (ferromagnetic), ZZ (Zigzag AFM), NL (Néel AFM), ST (stripy AFM)] and the ground state estimated within DFT total energies.

ground state shows no obvious magnetic order, signifying possibly a quantum spin liquid (QSL) state.

#### Supplementary Note 4: RuX<sub>3</sub> in the quasimolecular orbital basis

In Supplementary Fig. 2 we display the GGA calculations of the DOS for the experimental RuX<sub>3</sub> structures projected on the quasimolecular orbital (QMO) basis [7, 10, 11] that consists of a linear combination of  $t_{2g}$  states of the six Ru atoms in a hexagon. Such a calculation provides valuable information on the ligand-Ru hybridizations. We observe that the hopping backbone of the three materials keeps a well defined QMO structure since the GGA results are almost diagonal in this basis. This is a signature that ligand-assisted hopping processes play an important role in all three materials. Interestingly, both RuBr<sub>3</sub> (Supplementary Fig. 2b) and RuI<sub>3</sub> (Supplementary Fig. 2c) show almost purely  $A_{1g}$  symmetry near the Fermi level in contrast to RuCl<sub>3</sub>. Such a feature is directly related to the enhanced ligand-assisted hoppings due to the presence of heavier halogens.

#### Supplementary Note 5: Tabulated values of extracted $J_{eff=1/2}$ models

Tabulated values of the pseudospin models plotted in Fig. 5 of the main text are given in Supplementary Table 3. In addition, we show the model for the RuCl<sub>3</sub>  $R\bar{3}$  structure,

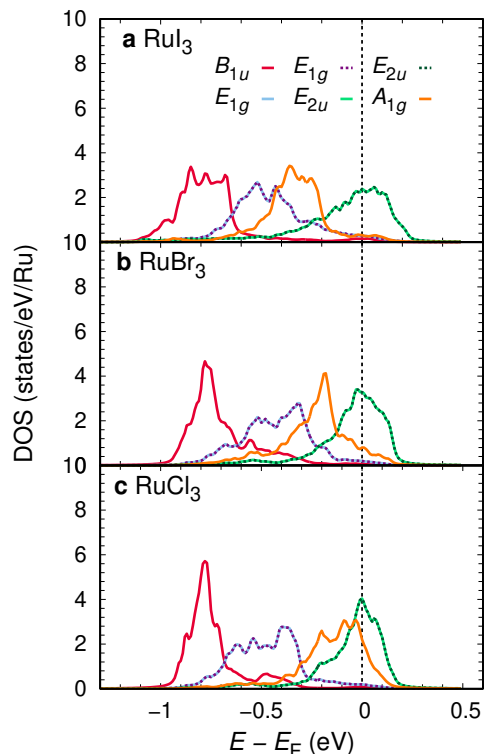

Supplementary Figure 2. **Density of states in the quasimolecular basis.** The DOS was obtained for RuX<sub>3</sub> materials within GGA calculations projected on the quasimolecular (QMO) basis using WIEN2k.

which is very similar to its C2/m counterpart.

#### Supplementary Note 6: Breakdown of SOC atomic limit

In the Jackeli-Khaliullin mechanism [12] the on-site overlap-integral matrix  $\mathbf{\Lambda}$  is usually assumed to follow the form of the so-called SOC atomic limit, such that  $\mathbf{\Lambda} \cdot \tilde{\mathbf{S}} = i \lambda_{eff} (\mathbf{L} \cdot \tilde{\mathbf{S}})$ , where  $\mathbf{L}$  is the hydrogen-orbital angular momentum matrix and  $\tilde{\mathbf{S}}$  is the electron spin. The RuCl<sub>3</sub>  $\mathbf{\Lambda}$ -matrix roughly follows the atomic limit, shown in Supplementary Table 4 for the  $z$  contribution  $\Lambda^z$ . In the same table, we also display the values for the sister compounds with increased halogen atomic number. These RuX<sub>3</sub> values were extracted from Wannier projection of a relativistic band structure calculation (see “Methods” section of the main manuscript). From comparing the four matrices in the table, one can make two important observations: First, with increasing ligand atomic number the matrix element  $\Lambda_{(xy, x^2-y^2)}^z$  (usually associated with  $2\lambda_{eff}$ ) rapidly falls, even changing sign between Br and I. Evidently, the SOC effects from magnetic ions and ligands compete in these cases, so that stronger ligand SOC does not directly lead to increased SOC effects in the effective  $d$  orbital picture. Second, with higher ligand atomic number, the atomic limit form of the SOC matrix breaks down: In

| RuX <sub>3</sub><br>structure | RuCl <sub>3</sub> |             | RuBr <sub>3</sub> | RuI <sub>3</sub> |
|-------------------------------|-------------------|-------------|-------------------|------------------|
|                               | C2/m              | R $\bar{3}$ | R $\bar{3}$       | R $\bar{3}$      |
| $J_1$                         | -2.97             | -2.92       | -2.91             | -0.06            |
| $K_1$                         | -5.30             | -6.01       | -4.04             | -5.81            |
| $\Gamma_1$                    | +2.96             | +2.69       | +2.81             | -0.67            |
| $\Gamma'_1$                   | -0.75             | -0.87       | -0.54             | -1.94            |
| $J_2$                         | +0.10             | +0.10       | +0.15             | +0.46            |
| $K_2$                         | -0.13             | -0.14       | -0.34             | -1.07            |
| $\Gamma_2$                    | +0.05             | +0.05       | +0.08             | +0.57            |
| $\Gamma'_2$                   | +0.05             | +0.04       | +0.01             | +0.19            |
| $J_3$                         | +0.11             | +0.10       | +0.04             | -0.08            |
| $K_3$                         | +0.07             | +0.07       | +0.15             | +0.31            |
| $\Gamma_3$                    | +0.03             | +0.02       | +0.04             | -0.03            |
| $\Gamma'_3$                   | -0.02             | +0.03       | -0.06             | -0.21            |
| $g_{\parallel}$               | +2.26             | +2.26       | +2.32             | +2.32            |
| $g_{\perp}$                   | +1.95             | +1.92       | +1.88             | +1.80            |

Supplementary Table 3. **Magnetic exchange in the RuX<sub>3</sub> family.** The parameters (in meV) for the experimental structures were extracted using the respective cRPA parameters ( $U_{\text{avg}}$ ,  $J_{\text{avg}}$ ) for each material. The values for the C2/m structure are C<sub>3</sub>-symmetrized (over X, Y, Z bonds).  $g_{\parallel}$  ( $g_{\perp}$ ) is the contribution to the gyromagnetic tensor  $\mathbb{G}$  parallel (perpendicular) to the honeycomb plane.

that limit, the nonzero matrix elements of  $\Lambda^z$  would have a ratio  $\Lambda^z_{(xy,x^2-y^2)}/\Lambda^z_{(xz,yz)} = 2$ , which is qualitatively satisfied for RuCl<sub>3</sub> (ratio  $\sim 1.4$ ), but not at all for its heavier sister compounds RuBr<sub>3</sub> ( $\sim 0.48$ ) and RuI<sub>3</sub> ( $\sim -0.6$ ). Furthermore, additional matrix elements which vanish in the atomic limit become much more relevant for RuBr<sub>3</sub> and RuI<sub>3</sub> (see Supplementary Table 4).

- 
- [1] Widmann, S. *et al.* Thermodynamic evidence of fractionalized excitations in  $\alpha$ -RuCl<sub>3</sub>. *Phys. Rev. B* **99**, 094415 (2019).
- [2] Imai, Y. *et al.* Zigzag magnetic order in the Kitaev spin-liquid candidate material RuBr<sub>3</sub> with a honeycomb lattice. *Phys. Rev. B* **105**, L041112 (2022).
- [3] Ni, D., Gui, X., Powderly, K. M. & Cava, R. J. Honeycomb-structure RuI<sub>3</sub>, a new quantum material related to  $\alpha$ -RuCl<sub>3</sub>. *Adv. Mater.* **34**, 2106831 (2022).
- [4] Nawa, K. *et al.* Strongly electron-correlated semimetal RuI<sub>3</sub> with a layered honeycomb structure. *J. Phys. Soc. Japan* **90**, 123703 (2021).
- [5] Cao, H. B. *et al.* Low-temperature crystal and magnetic structure of  $\alpha$ -RuCl<sub>3</sub>. *Phys. Rev. B* **93**, 134423 (2016).
- [6] Park, S.-Y. *et al.* Emergence of the isotropic Kitaev honeycomb lattice with two-dimensional Ising universality in  $\alpha$ -RuCl<sub>3</sub>. *Preprint at <https://arxiv.org/abs/1609.05690>* (2016).
- [7] Johnson, R. D. *et al.* Monoclinic crystal structure of  $\alpha$ -RuCl<sub>3</sub> and the zigzag antiferromagnetic ground state. *Phys. Rev. B* **92**, 235119 (2015).
- [8] Mu, S. *et al.* Role of the third dimension in searching for Majorana fermions in  $\alpha$ -RuCl<sub>3</sub> via phonons. *Phys. Rev. Research* **4**, 013067 (2022).
- [9] Sears, J. A. *et al.* Ferromagnetic Kitaev interaction and the origin of large magnetic anisotropy in  $\alpha$ -RuCl<sub>3</sub>. *Nat. Phys.* **16**, 837–840 (2020).
- [10] Mazin, I. I., Jeschke, H. O., Foyevtsova, K., Valentí, R. & Khomskii, D. I. Na<sub>2</sub>IrO<sub>3</sub> as a molecular orbital crystal. *Phys. Rev. Lett.* **109**, 197201 (2012).
- [11] Foyevtsova, K., Jeschke, H. O., Mazin, I. I., Khomskii, D. I. & Valentí, R. Ab initio analysis of the tight-binding parameters and magnetic interactions in Na<sub>2</sub>IrO<sub>3</sub>. *Phys. Rev. B* **88**, 035107 (2013).
- [12] Jackeli, G. & Khaliullin, G. Mott Insulators in the Strong Spin-Orbit Coupling Limit: From Heisenberg to a Quantum Compass and Kitaev Models. *Phys. Rev. Lett.* **102**, 017205 (2009).

| $\Lambda^z$   | atomic limit             |                         |           |                        |                         | RuCl <sub>3</sub> |          |           |          |               | RuBr <sub>3</sub> |          |           |          |               | RuI <sub>3</sub> |          |           |          |               |
|---------------|--------------------------|-------------------------|-----------|------------------------|-------------------------|-------------------|----------|-----------|----------|---------------|-------------------|----------|-----------|----------|---------------|------------------|----------|-----------|----------|---------------|
|               | $d_{xy}$                 | $d_{yz}$                | $d_{z^2}$ | $d_{xz}$               | $d_{x^2-y^2}$           | $d_{xy}$          | $d_{yz}$ | $d_{z^2}$ | $d_{xz}$ | $d_{x^2-y^2}$ | $d_{xy}$          | $d_{yz}$ | $d_{z^2}$ | $d_{xz}$ | $d_{x^2-y^2}$ | $d_{xy}$         | $d_{yz}$ | $d_{z^2}$ | $d_{xz}$ | $d_{x^2-y^2}$ |
| $d_{xy}$      | 0                        | 0                       | 0         | 0                      | $2\lambda_{\text{eff}}$ | 0                 | -1       | 0         | 1        | 162           | 0                 | 1        | 0         | 5        | 61            | 0                | -12      | 1         | -5       | -75           |
| $d_{yz}$      | 0                        | 0                       | 0         | $\lambda_{\text{eff}}$ | 0                       | 1                 | 0        | -0        | 113      | 1             | -1                | 0        | -4        | 128      | 3             | 12               | 0        | 4         | 126      | 0             |
| $d_{z^2}$     | 0                        | 0                       | 0         | 0                      | 0                       | 0                 | 0        | 0         | 0        | 1             | 0                 | 4        | 0         | 1        | 4             | -1               | -4       | 0         | -10      | 10            |
| $d_{xz}$      | 0                        | $-\lambda_{\text{eff}}$ | 0         | 0                      | 0                       | -1                | -113     | 0         | 0        | 1             | -5                | -128     | -1        | 0        | 0             | 5                | -126     | 10        | 0        | 6             |
| $d_{x^2-y^2}$ | $-2\lambda_{\text{eff}}$ | 0                       | 0         | 0                      | 0                       | -162              | -1       | -1        | -1       | 0             | -61               | -3       | -4        | -0       | 0             | 75               | 0        | -10       | -6       | 0             |

Supplementary Table 4. **Breakdown of the SOC atomic limit for increasing halogen atomic number.** Comparison of the z-component of the d-orbital on-site overlap matrix  $\Lambda$  in the SOC atomic limit (where  $\Lambda \cdot \tilde{\mathbf{S}} = i\lambda_{\text{eff}}\mathbf{L} \cdot \tilde{\mathbf{S}}$ ) versus *ab-initio* values for RuX<sub>3</sub> (in meV), extracted from relativistic DFT calculations for the indicated compounds.
